# Supplementary material
Source: PubMed Central journal article supplement (PMC3265621)
Supplement: NIHMS344482-supplement-1_si_001.pdf [file NIHMS344482-supplement-1_si_001.pdf]

Supporting Information for

## Quantifying the Coverage Density of Poly(ethylene glycol) Chains on the Surface of Gold Nanostructures

Xiaohu Xia,<sup>†,□,§</sup> Miaoxin Yang,<sup>†,§</sup> Yucai Wang,<sup>†</sup> Yiqun Zheng,<sup>⊥</sup> Qingge Li,<sup>□</sup> Jingyi Chen,<sup>†,‡,\*</sup> and  
Yunan Xia<sup>†,€,\*</sup>

<sup>†</sup>Department of Biomedical Engineering, Washington University, St. Louis, Missouri 63130,  
United States

<sup>‡</sup>Department of Chemistry and Biochemistry, University of Arkansas, Fayetteville, Arkansas  
72701, United States

<sup>□</sup>Engineering Research Center of Molecular Diagnostics, School of Life Sciences, Xiamen  
University, Xiamen, Fujian 361005, P. R. China

<sup>⊥</sup>Department of Chemistry, Washington University, St. Louis, Missouri 63130, United States

<sup>§</sup>These two authors contributed equally to this work.

<sup>€</sup>Current address:

The Wallace H. Coulter Department of Biomedical Engineering  
Georgia Institute of Technology and Emory University Medical School  
School of Chemistry and Biochemistry  
Georgia Institute of Technology  
Atlanta, Georgia 30332, United States

\*Address correspondence to younan.xia@bme.gatech.edu, chenj@uark.edu.

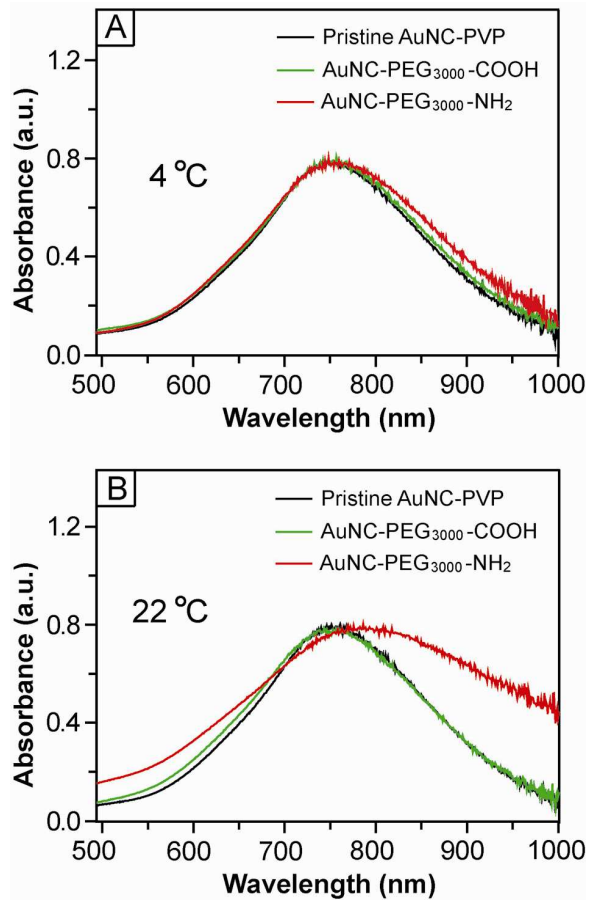

**Figure S1.** UV-vis spectra of 50-nm AuNCs before and after functionalization with HS-PEG<sub>3000</sub>-NH<sub>2</sub> or HS-PEG<sub>3000</sub>-COOH at two different temperatures: (A) 4 °C and (B) 22 °C.

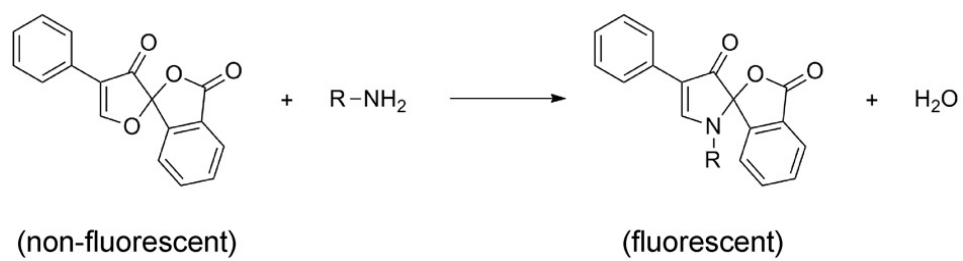

**Figure S2.** Scheme of the reaction between fluorescamine and a primary amine that generates a fluorescent product.

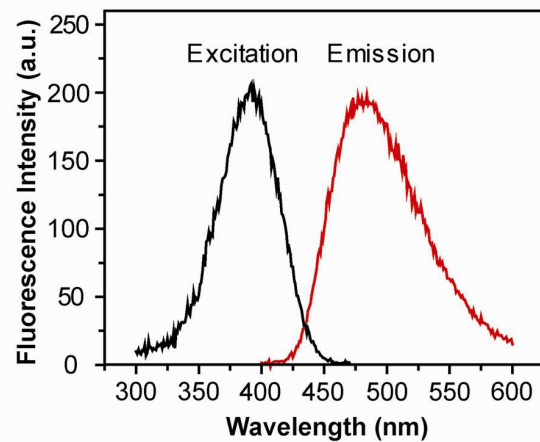

**Figure S3.** Typical excitation and emission spectra of the chromophore generated from the reaction between fluorescamine and HS-PEG<sub>5000</sub>-NH<sub>2</sub>.

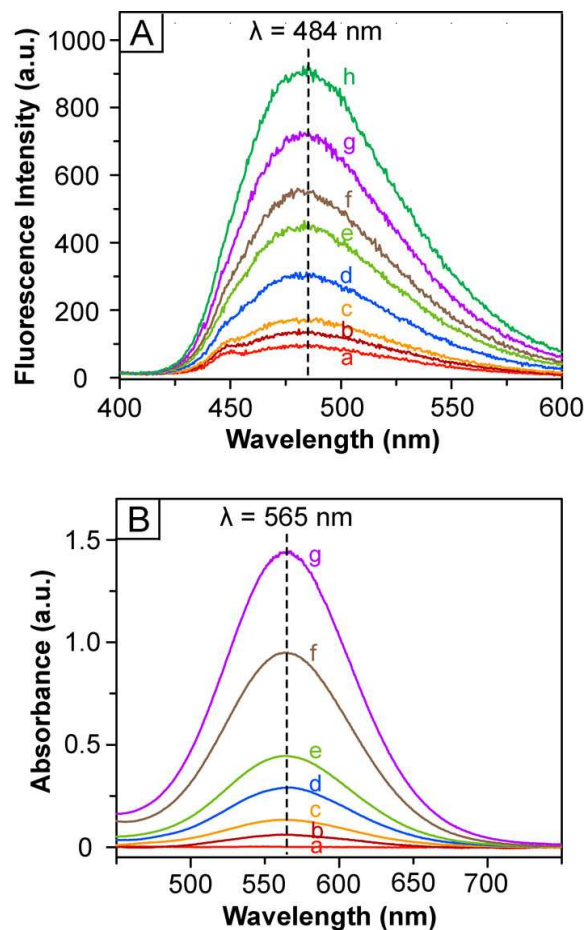

**Figure S4.** (A) Fluorescence spectra of the chromophore derived from fluorescamine by reacting with different concentration of HS-PEG<sub>5000</sub>-NH<sub>2</sub> at pH = 10: (a) 0.25, (b) 0.38, (c) 0.50, (d) 1.0, (e) 1.5, (f) 2.0 (g) 2.5, and (h) 3.0  $\mu$ M. By plotting the fluorescence intensity at 565 nm against the concentration of HS-PEG<sub>5000</sub>-NH<sub>2</sub>, we obtained the calibration curve shown in Figure 4A. (B) UV-vis spectra of the chromophore derived from ninhydrin by reacting with different concentrations of HS-PEG<sub>5000</sub>-NH<sub>2</sub>: (a) 0.5, (b) 5, (c) 10, (d) 20, (e) 33.3, (f) 66.7, and (g) 100  $\mu$ M. By plotting the absorbance at 565 nm against the concentration of HS-PEG<sub>5000</sub>-NH<sub>2</sub>, we obtained the calibration curve shown in Figure 5A.

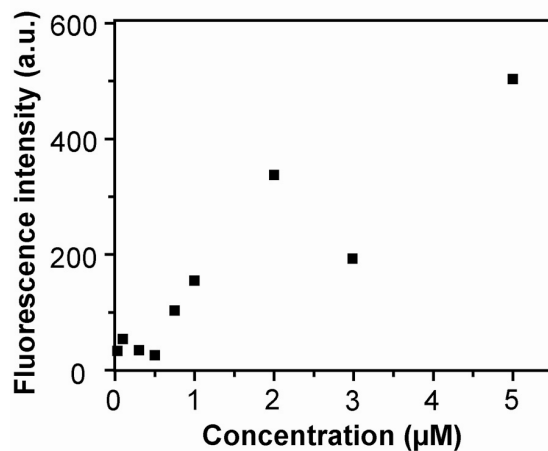

**Figure S5.** Calibration curve for fluorescamine-based assay using HS-PEG<sub>5000</sub>-NH<sub>2</sub>, which was obtained by plotting the fluorescence intensity at 480 nm against the concentration of HS-PEG<sub>5000</sub>-NH<sub>2</sub> at pH = 6.5.

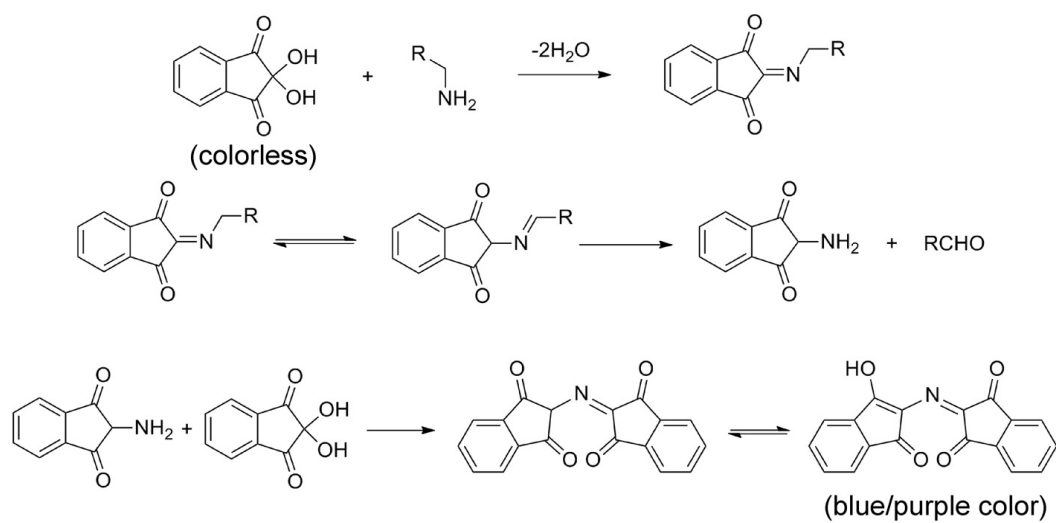

**Figure S6.** Scheme of the reaction between ninhydrin and a primary amine that generates a colored product.

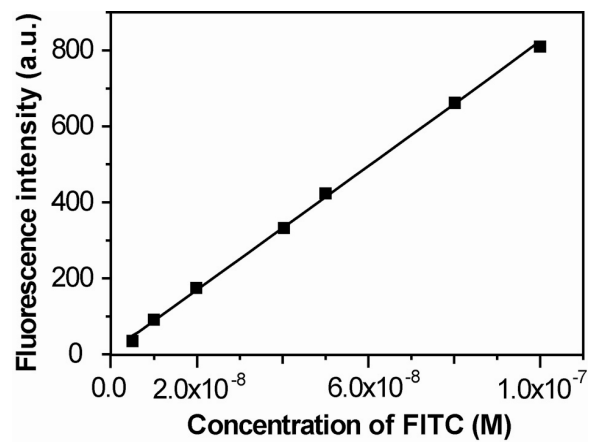

**Figure S7.** Calibration curve for FITC that was obtained by plotting the fluorescence intensity at 520 nm against the concentration of FITC.



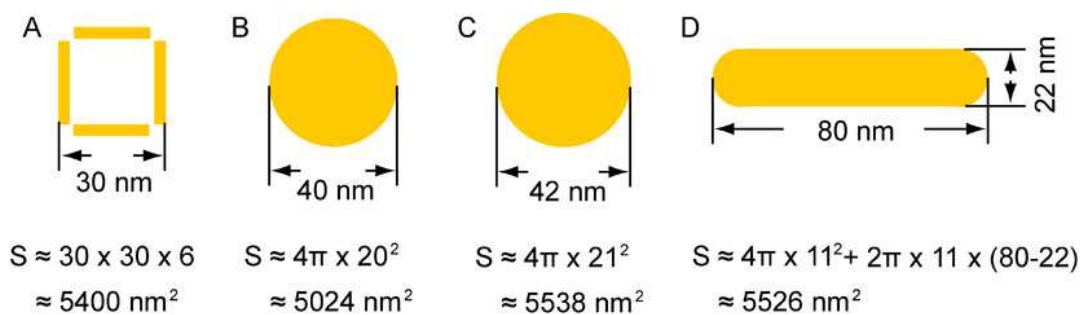

**Figure S8.** Calculations of surface areas ( $S$ ) for the four different types of Au nanostructures: (A) AuNC (only outer surface was considered in the calculation), (B) CTAC-capped AuNP, (C) citrate-capped AuNP, and (D) CTAB-capped AuNR. The sizes and morphologies were obtained from the TEM images shown in Figure 2, A, D, E, and F, respectively.

**Table S1.** Characterization of the 50-nm AuNCs with different surface coatings. PEGylation of AuNCs was conducted at 4 °C and 22 °C for each sample.

|                                            | Temperature | Hydrodynamic diameter (nm) | Polydispersity index | Zeta potential (mV) |
|--------------------------------------------|-------------|----------------------------|----------------------|---------------------|
| AuNC-PVP                                   | 4 °C        | 96.1                       | 0.188                | -47.9               |
| AuNC-PVP                                   | 22 °C       | 99.2                       | 0.197                | -57.1               |
| AuNC-PEG <sub>3000</sub> -NH <sub>2</sub>  | 4 °C        | 108.1                      | 0.241                | 20.3                |
| AuNC-PEG <sub>3000</sub> -NH <sub>2</sub>  | 22 °C       | 190.6                      | 0.296                | 14.6                |
| AuNC-PEG <sub>5000</sub> -NH <sub>2</sub>  | 4 °C        | 130.7                      | 0.226                | 11.7                |
| AuNC-PEG <sub>5000</sub> -NH <sub>2</sub>  | 22 °C       | 204.9                      | 0.287                | -2.6                |
| AuNC-PEG <sub>20000</sub> -NH <sub>2</sub> | 4 °C        | 113.9                      | 0.154                | -35                 |
| AuNC-PEG <sub>20000</sub> -NH <sub>2</sub> | 22 °C       | 115.6                      | 0.143                | -31.2               |
| AuNC-PEG <sub>3000</sub> -COOH             | 4 °C        | 104.0                      | 0.212                | -40.4               |
| AuNC-PEG <sub>3000</sub> -COOH             | 22 °C       | 101.9                      | 0.206                | -36.7               |
